# Supplementary material for: Cu2+ Release from Polylactic Acid Coating on Titanium Reduces Bone Implant-Related Infection
Source: MDPI journal article supplement (doi:10.3390/jfb13020078), 2022-06-10

**Supplementary Figure S1 (a) Water contact angles and (b) surface roughness (Ra) of different samples.**

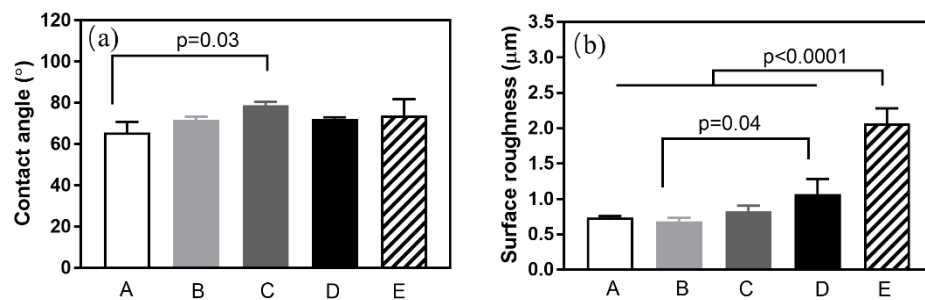

**Supplementary Figure S2** SEM micrographs of samples from Groups A and E after immersion in DMEM for 2 d; note 1) the smoother and more featureless surface (i.e., coating) on Group E sample vs. the grainy texture of Group A; 2) two circular structures on Group E sample are the “footprints” of two original  $\text{CuCl}_2$  particles dissolved during immersion.

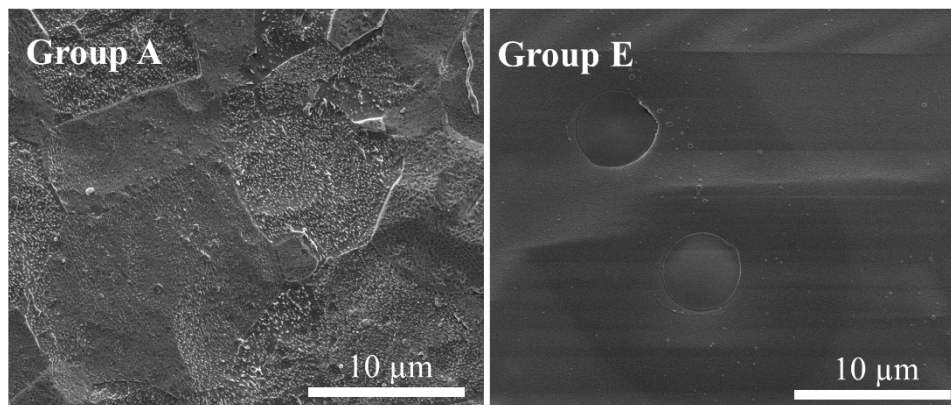

**Supplementary Figure S3** SEM images of Ti discs after co-culture with *S. aureus* for

6 h

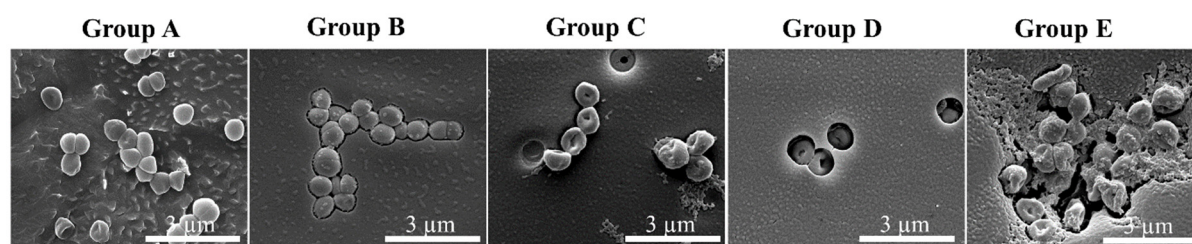

Supplement: s1 [file s1]
